# Supplementary material for: MicroRNA signature refine response prediction in CML
Source: PubMed Central journal article supplement (PMC6609611; doi:10.1038/s41598-019-46132-9), 2019-07-04
Supplement: 41598_2019_46132_MOESM1_ESM.pdf [file 41598_2019_46132_MOESM1_ESM.pdf]

## **Supplementary Information**

### **MicroRNA signature refine response prediction in CML**

Raquel Alves<sup>1,2,3</sup>, Ana Cristina Gonçalves<sup>1,2,3</sup>, Joana Jorge<sup>1,2,3</sup>, Gilberto Marques<sup>4</sup>, Dino Luís<sup>5</sup>, André B. Ribeiro<sup>2,5</sup>, Paulo Freitas-Tavares<sup>5</sup>, Bárbara Oliveiros<sup>2,6</sup>, António M. Almeida<sup>7,8</sup> and Ana Bela Sarmiento-Ribeiro<sup>1,2,3,5\*</sup>

## Supplementary Figures

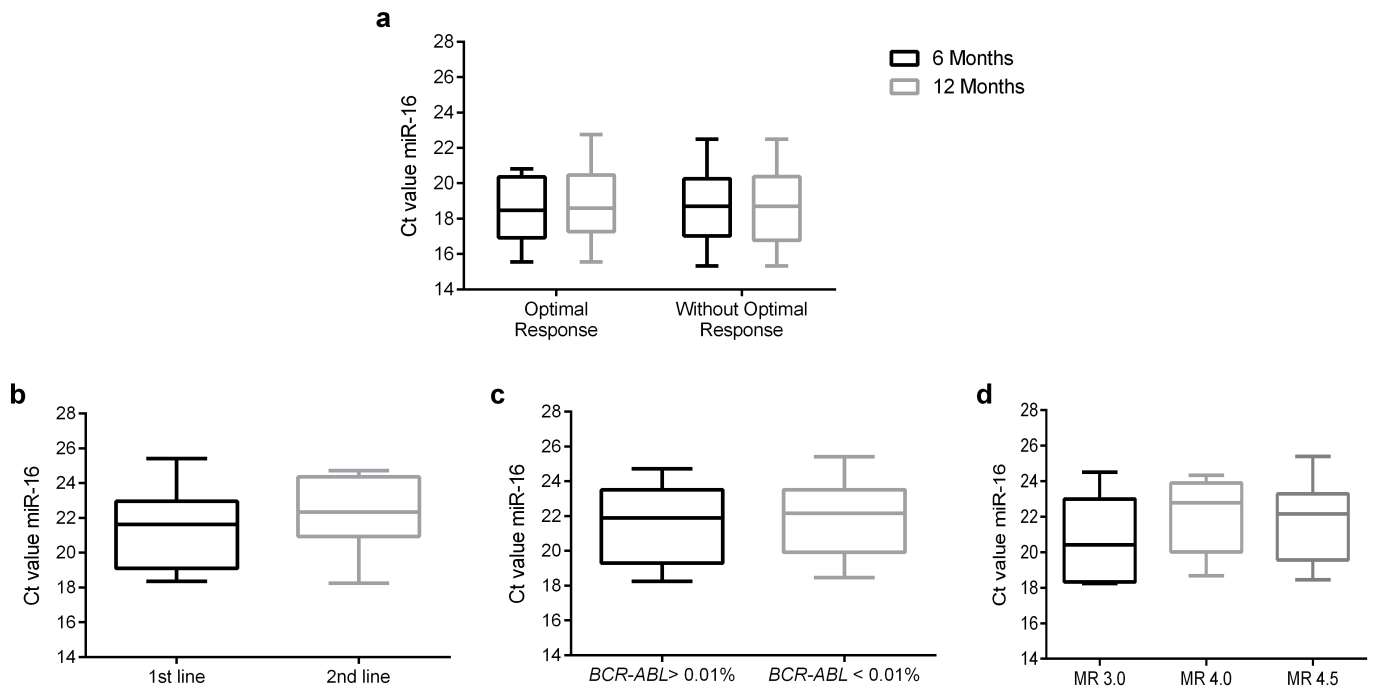

**Figure S1 – Ct variance of miR-16 in CML patients according the different comparative groups.** The Ct value of miR-16 of CML patients at diagnosis according response levels (a). At follow-up measures, the Ct variance of this miR according to the number of TKI that patients were exposed (b), to *BCR-ABL1* values (c) and to molecular response rates (d). The results are represented as median with interquartile range. Any statistical difference was detected between groups.
